# Supplementary material for: Effects of Virtual Speaker Density and Room Reverberation on Spatiotemporal Thresholds of Audio-Visual Motion Coherence
Source: PubMed Central journal article supplement (PMC4182487; doi:10.1371/journal.pone.0108437), 2014-09-30
Supplement: pone.0108437.s001.pdf [file pone.0108437.s001.pdf]

**Table S1:** Individual PSE values for all 6 participants across the three acoustic conditions and three experimental velocities tested in experiments 1 and 2.

| Stimulus Velocity | 25°/s            | 50°/s | 100°/s |
|-------------------|------------------|-------|--------|
| Subject No.       | Anechoic (1°)    |       |        |
| 1                 | -0.61            | 1.45  | 0.00   |
| 2                 | 1.69             | 0.99  | -0.16  |
| 3                 | 0.30             | -1.74 | -2.78  |
| 4                 | 1.07             | 0.28  | -0.49  |
| 5                 | 2.27             | 1.02  | 3.60   |
| 6                 | 2.53             | 2.54  | -1.98  |
| Subject No.       | Anechoic (5°)    |       |        |
| 1                 | 0.24             | 0.84  | 1.04   |
| 2                 | 1.85             | 0.43  | -1.85  |
| 3                 | -0.86            | -1.81 | -4.33  |
| 4                 | -1.37            | -2.98 | -3.01  |
| 5                 | 1.20             | 1.68  | 2.99   |
| 6                 | 1.59             | 1.54  | -1.56  |
| Subject No.       | Reverberant (5°) |       |        |
| 1                 | -0.61            | 1.90  | 0.24   |
| 2                 | 0.66             | 0.33  | 0.24   |
| 3                 | -0.02            | -1.82 | -4.41  |
| 4                 | -2.21            | -2.54 | -3.01  |
| 5                 | 1.20             | 0.86  | 3.55   |
| 6                 | 1.48             | 1.91  | -1.67  |
